# Supplementary material for: Highly enhanced lithium storage capability of LiNi0.5Mn1.5O4 by coating with Li2TiO3 for Li-ion batteries
Source: Royal Society of Chemistry journal article supplement (doi:10.1039/c4ta03802a), 2014-01-01
Supplement: c4ta03802a1.pdf [file c4ta03802a1.pdf]

Electronic Supplementary material (ESI) for Journal of Materials Chemistry A  
This journal is © The Royal Society of Chemistry 2014

## **Electronic Supplementary Information (ESI)**

### **Highly Enhanced Lithium Storage Capability of LiNi<sub>0.5</sub>Mn<sub>1.5</sub>O<sub>4</sub> by Coating with Li<sub>2</sub>TiO<sub>3</sub> for Li-ion Batteries**

Haifu Deng, Ping Nie, Haifeng Luo, Yi Zhang, Jie Wang, and Xiaogang Zhang\*

College of Material Science and Engineering and Key Laboratory for Intelligent Nano  
Materials and Devices of Ministry of Education, Nanjing University of Aeronautics  
and Astronautics, Nanjing, 210016, P. R. China.

\*Corresponding author, azhangxg@163.com; Tel: +86-25-52112918; Fax: +86-25-  
52112626.

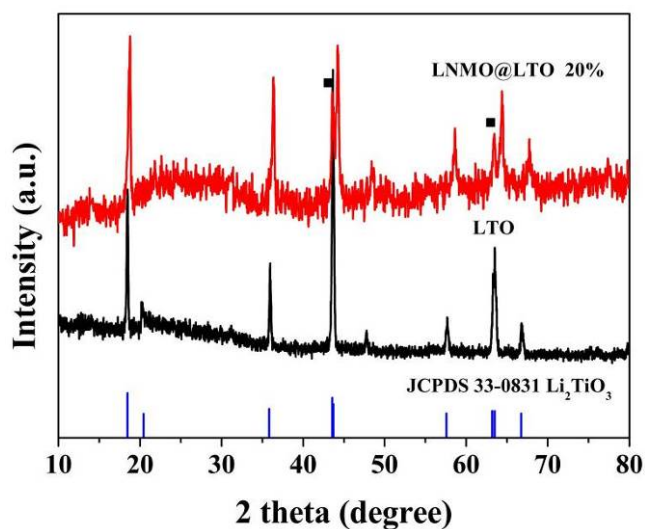

**Figure S 1** XRD patterns of pristine  $\text{Li}_2\text{TiO}_3$  (LTO) and LNMO@LTO 20 % materials.

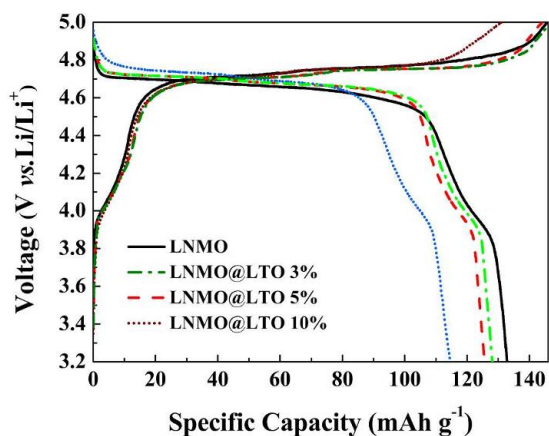

**Figure S 2** Galvanostatic charge/discharge curves of pristine LNMO and LNMO@LTO samples.

**Table S 1** Rietveld refinement results of the bare LNMO and LNMO@LTO materials

| Sample      | Space group | $a$ (Å) | Vol. (Å <sup>3</sup> ) |
|-------------|-------------|---------|------------------------|
| Bare LNMO   | $Fd-3m$     | 8.16994 | 545.33                 |
| LNMO@LTO 3% | $Fd-3m$     | 8.17295 | 545.93                 |
| LNMO@LTO 5% | $Fd-3m$     | 8.17427 | 546.19                 |
